# Supplementary material for: Design and theoretical studies of FOX-7-like novel energetic compounds
Source: Royal Society of Chemistry journal article supplement (doi:10.1039/d2nj05155a), 2022-11-30
Supplement: d2nj05155a1.pdf [file d2nj05155a1.pdf]

## Electronic supplementary information

### Design and theoretical studies of FOX-7-like novel energetic compounds

Mei Xue <sup>a</sup>, Yunlu Li <sup>b</sup>, Chunlin He <sup>\*a,c,d</sup> and Siping Pang <sup>\*a,c</sup>

<sup>a</sup> Experimental Center of Advanced Materials, School of Materials Science & Engineering, Beijing Institute of Technology, Beijing 10081, China.

<sup>b</sup> School of Materials and Energy, University of Electronic Science and Technology of China, Chengdu, 610054, China.

<sup>c</sup> State Key Laboratory of Explosion Science and Technology, Beijing Institute of Technology, Beijing 10081, China.

<sup>d</sup> Chongqing Innovation Center, Beijing Institute of Technology, Chongqing 401120, China.

\* corresponding authors:

E-mail: chunlinhe@bit.edu.cn (C. He); pangsp@bit.edu.cn (S. Pang)

#### Contents

- 1. Fig. S1.** The optimized structures of compounds **2a** ~ **2e** demonstrated from different viewpoints.
- 2. Fig. S2.** The optimized structures of compounds **2f** ~ **4** demonstrated from different viewpoints.
- 3. Table S1.** Bond lengths, bond orders and nitro group charges of the optimized title molecules.
- 4. Scheme S1** Isodesmic reactions for title compounds.

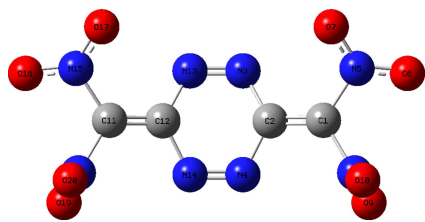

2a

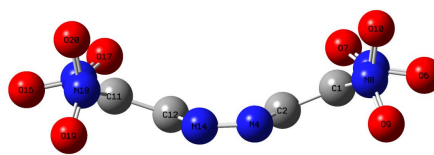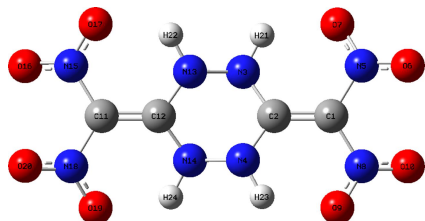

2b

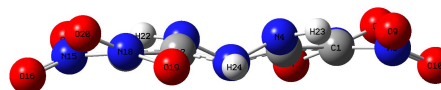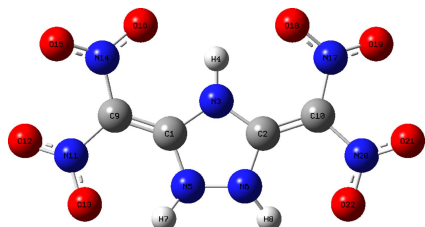

2c

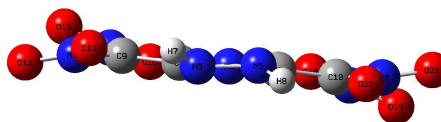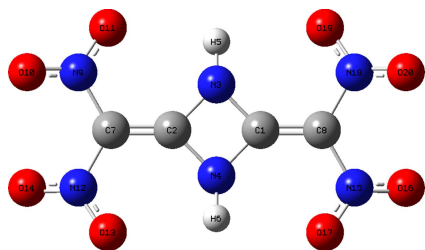

2d

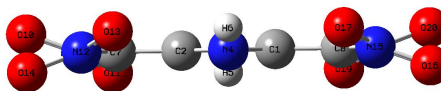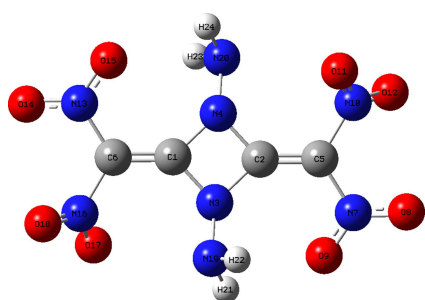

2e

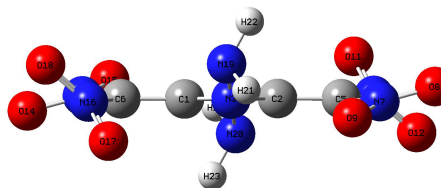

Fig. S1. The optimized structures of compounds 2a~2e demonstrated from different viewpoints.

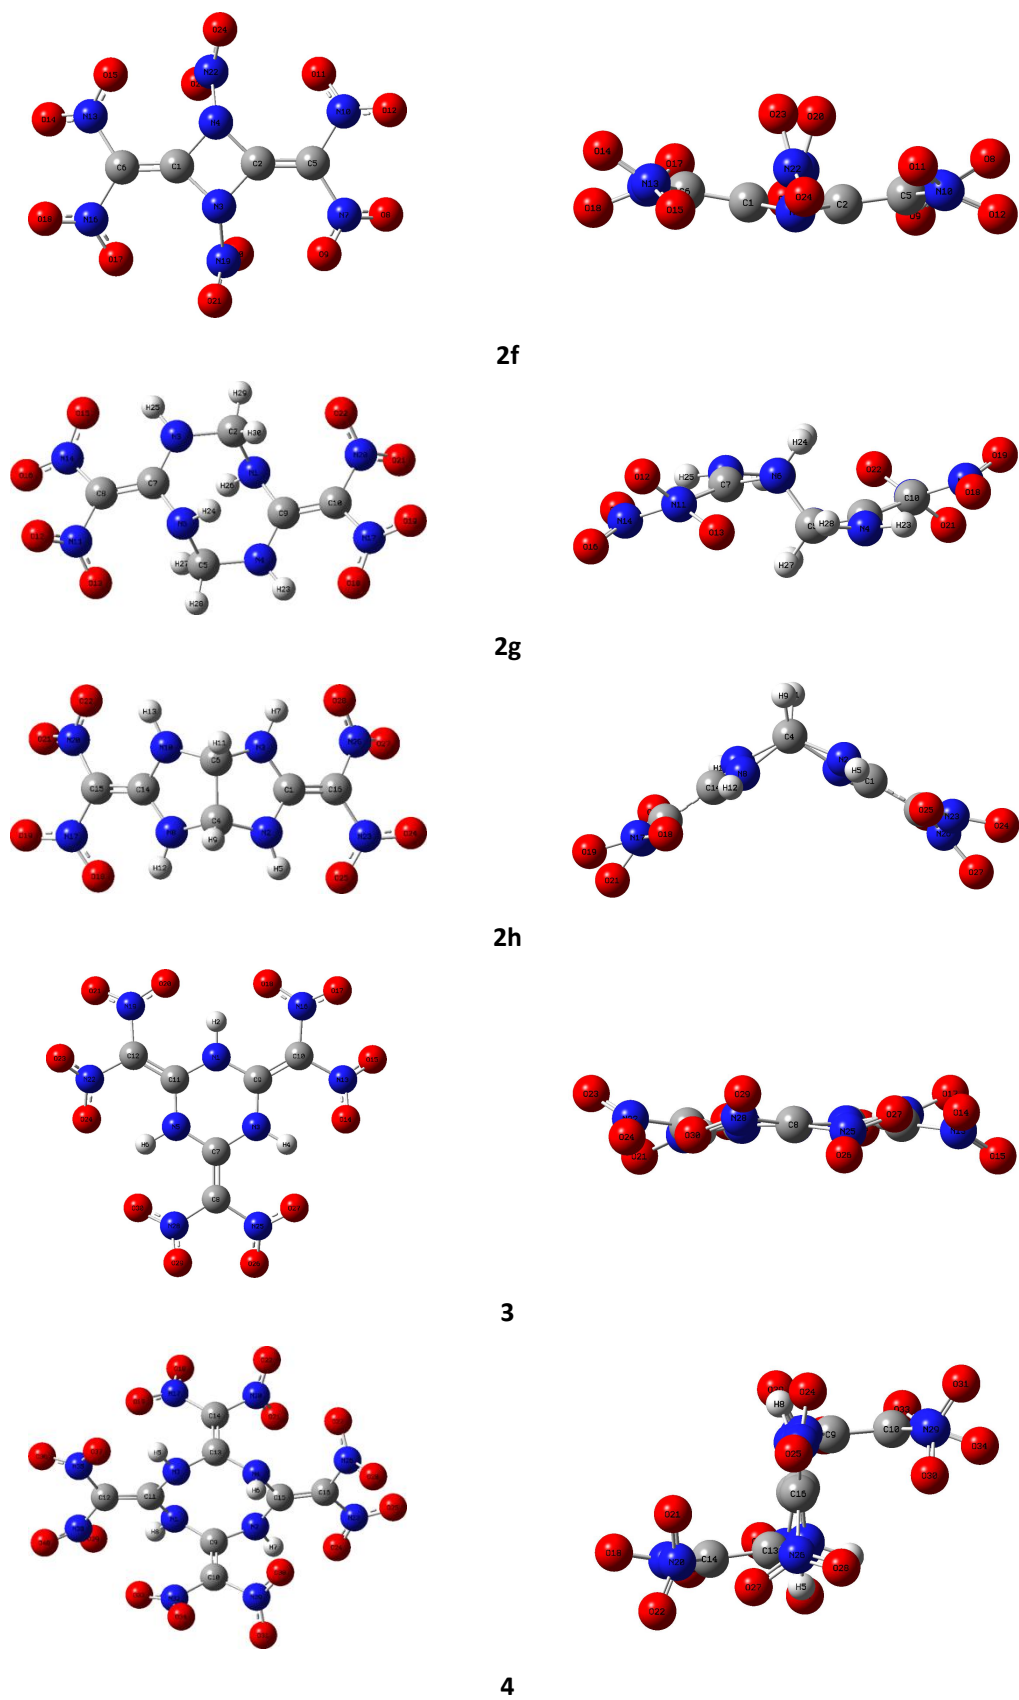

Fig. S2. The optimized structures of compounds 2f~4 demonstrated from different viewpoints.

Table S1. Bond lengths, bond orders and nitro group charges of the optimized title molecules.

| Bonds                    | bond lengths/Å | LBO    | Mayer  | $Q_{\text{NO}_2}$ | Bonds                    | bond lengths/Å | LBO    | Mayer  | $Q_{\text{NO}_2}$ |
|--------------------------|----------------|--------|--------|-------------------|--------------------------|----------------|--------|--------|-------------------|
| 2a                       |                |        |        |                   | 2b                       |                |        |        |                   |
| C1=C2                    | 1.3335         | 1.8543 | 1.6808 |                   | C1=C2                    | 1.3963         | 1.4743 | 1.4211 |                   |
| C1-N5(O <sub>2</sub> )   | 1.4702         | 0.7620 | 0.9350 | -0.073            | C1-N5(O <sub>2</sub> )   | 1.4359         | 0.8207 | 1.0290 | -0.223            |
| C1-N8(O <sub>2</sub> )   | 1.4765         | 0.7515 | 0.9637 | -0.088            | C1-N8(O <sub>2</sub> )   | 1.4358         | 0.8208 | 1.0290 | -0.223            |
| C2-N3                    | 1.4109         | 0.9520 | 1.0683 |                   | C2-N3                    | 1.3514         | 1.1728 | 1.2513 |                   |
| C2-N4                    | 1.4208         | 0.9008 | 1.0288 |                   | C2-N4                    | 1.3514         | 1.1730 | 1.2515 |                   |
| N3=N13                   | 1.2449         | 1.4943 | 1.6946 |                   | N3-N13                   | 1.4051         | 0.6050 | 0.8796 |                   |
| N4=N14                   | 1.2422         | 1.5143 | 1.7006 |                   | N4-N14                   | 1.4053         | 0.6045 | 0.8796 |                   |
| C11=C12                  | 1.3335         | 1.8544 | 1.6808 |                   | C11=C12                  | 1.3963         | 1.4744 | 1.4210 |                   |
| C11-N15(O <sub>2</sub> ) | 1.4702         | 0.7620 | 0.9350 | -0.073            | C11-N15(O <sub>2</sub> ) | 1.4359         | 0.8207 | 1.0290 | -0.223            |
| C11-N18(O <sub>2</sub> ) | 1.4765         | 0.7515 | 0.9637 | -0.088            | C11-N18(O <sub>2</sub> ) | 1.4359         | 0.8206 | 1.0289 | -0.223            |
| C12-N13                  | 1.4109         | 0.9520 | 1.0683 |                   | C12-N13                  | 1.3513         | 1.1731 | 1.2517 |                   |
| C12-N14                  | 1.4208         | 0.9007 | 1.0288 |                   | C12-N14                  | 1.3515         | 1.1724 | 1.2512 |                   |
| 2c                       |                |        |        |                   | 2d                       |                |        |        |                   |
| C1-N3                    | 1.3660         | 1.0666 | 1.1888 |                   | C1-N3                    | 1.3888         | 0.9546 | 1.1299 |                   |
| C1-N5                    | 1.3454         | 1.1850 | 1.2680 |                   | C1-N4                    | 1.3886         | 0.9553 | 1.1302 |                   |
| C1=C9                    | 1.3916         | 1.5022 | 1.4299 |                   | C1=C8                    | 1.3461         | 1.7849 | 1.5954 |                   |
| C2-N3                    | 1.3660         | 1.0665 | 1.1887 |                   | C2-N3                    | 1.3888         | 0.9546 | 1.1299 |                   |
| C2-N6                    | 1.3454         | 1.1849 | 1.2679 |                   | C2-N4                    | 1.3886         | 0.9553 | 1.1302 |                   |
| C2=C10                   | 1.3916         | 1.5024 | 1.4299 |                   | C2=C7                    | 1.3461         | 1.7849 | 1.5953 |                   |
| N5-N6                    | 1.3802         | 0.7012 | 0.9284 |                   | C7-N9(O <sub>2</sub> )   | 1.4497         | 0.7935 | 0.9767 | -0.149            |
| C9-N11(O <sub>2</sub> )  | 1.4310         | 0.8413 | 1.0553 | -0.218            | C7-N12(O <sub>2</sub> )  | 1.4497         | 0.7936 | 0.9768 | -0.149            |
| C9-N14(O <sub>2</sub> )  | 1.4366         | 0.8241 | 1.0324 | -0.203            | C8-N15(O <sub>2</sub> )  | 1.4497         | 0.7936 | 0.9768 | -0.149            |
| C10-N17(O <sub>2</sub> ) | 1.4366         | 0.8240 | 1.0323 | -0.203            | C8-N18(O <sub>2</sub> )  | 1.4497         | 0.7935 | 0.9767 | -0.149            |
| C10-N20(O <sub>2</sub> ) | 1.4310         | 0.8414 | 1.0552 | -0.218            |                          |                |        |        |                   |
| 2e                       |                |        |        |                   | 2f                       |                |        |        |                   |
| C1-N3                    | 1.3991         | 0.9112 | 1.1167 |                   | C1-N3                    | 1.4182         | 0.7966 | 1.0659 |                   |
| C1-N4                    | 1.4030         | 0.8691 | 1.1174 |                   | C1-N4                    | 1.4157         | 0.8259 | 1.0358 |                   |
| C1=C6                    | 1.3411         | 1.7932 | 1.6059 |                   | C1=C6                    | 1.3355         | 1.8354 | 1.6659 |                   |
| C2-N3                    | 1.4031         | 0.8688 | 1.1173 |                   | C2-N3                    | 1.4157         | 0.8261 | 1.0359 |                   |
| C2-N4                    | 1.3990         | 0.9113 | 1.1168 |                   | C2-N4                    | 1.4183         | 0.7965 | 1.0658 |                   |
| C2=C5                    | 1.3411         | 1.7933 | 1.6059 |                   | C2=C5                    | 1.3355         | 1.8354 | 1.6659 |                   |
| N3-N19                   | 1.3858         | 0.6642 | 0.9729 |                   | N3-N19(O <sub>2</sub> )  | 1.5474         | 0.2438 | 0.7919 | 0.054             |
| N4-N20                   | 1.3858         | 0.6641 | 0.9730 |                   | N4-N22(O <sub>2</sub> )  | 1.5477         | 0.2434 | 0.7918 | 0.054             |
| C5-N7(O <sub>2</sub> )   | 1.4442         | 0.8090 | 0.9840 | -0.165            | C5-N7(O <sub>2</sub> )   | 1.4617         | 0.7654 | 0.9407 | -0.110            |
| C5-N10(O <sub>2</sub> )  | 1.4648         | 0.7511 | 0.9388 | -0.126            | C5-N10(O <sub>2</sub> )  | 1.4599         | 0.7719 | 0.9330 | -0.103            |
| C6-N13(O <sub>2</sub> )  | 1.4441         | 0.8091 | 0.9841 | -0.165            | C6-N13(O <sub>2</sub> )  | 1.4617         | 0.7654 | 0.9407 | -0.110            |
| C6-N16(O <sub>2</sub> )  | 1.4648         | 0.7510 | 0.9388 | -0.126            | C6-N16(O <sub>2</sub> )  | 1.4599         | 0.7720 | 0.9330 | -0.103            |

Continued to Table S1.

| Bonds                    | bond lengths/Å | LBO    | Mayer  | $Q_{\text{NO}_2}$ | Bonds                    | bond lengths/Å | LBO    | Mayer  | $Q_{\text{NO}_2}$ |
|--------------------------|----------------|--------|--------|-------------------|--------------------------|----------------|--------|--------|-------------------|
| <b>2g</b>                |                |        |        |                   | <b>2h</b>                |                |        |        |                   |
| C2-N1                    | 1.4644         | 0.6595 | 0.8653 |                   | C1-N2                    | 1.3517         | 1.1340 | 1.2450 |                   |
| C2-N3                    | 1.4640         | 0.6720 | 0.8981 |                   | C1-N3                    | 1.3477         | 1.1538 | 1.2592 |                   |
| C5-N4                    | 1.4640         | 0.6719 | 0.8981 |                   | C1=C16                   | 1.3955         | 1.4939 | 1.4184 |                   |
| C5-N6                    | 1.4644         | 0.6595 | 0.8653 |                   | C4-N2                    | 1.4431         | 0.7402 | 0.9397 |                   |
| C7-N3                    | 1.3468         | 1.1729 | 1.2926 |                   | C4-C6                    | 1.5527         | 0.9221 | 0.9887 |                   |
| C7-N6                    | 1.3935         | 0.9724 | 1.0867 |                   | C4-N8                    | 1.4526         | 0.7053 | 0.8925 |                   |
| C7=C8                    | 1.3767         | 1.5932 | 1.5455 |                   | C6-N3                    | 1.4526         | 0.7008 | 0.9023 |                   |
| C8-N11(O <sub>2</sub> )  | 1.4654         | 0.7421 | 0.9779 | -0.155            | C6-N10                   | 1.4412         | 0.7507 | 0.9203 |                   |
| C8-N14(O <sub>2</sub> )  | 1.4270         | 0.8603 | 1.0488 | -0.227            | C14-N8                   | 1.3462         | 1.1585 | 1.2812 |                   |
| C9-N1                    | 1.3935         | 0.9723 | 1.0867 |                   | C14-N10                  | 1.3494         | 1.1453 | 1.2605 |                   |
| C9-N4                    | 1.3468         | 1.1730 | 1.2925 |                   | C14=C15                  | 1.3982         | 1.4797 | 1.4126 |                   |
| C9=C10                   | 1.3767         | 1.5933 | 1.5456 |                   | C15-N17(O <sub>2</sub> ) | 1.4333         | 0.8324 | 1.0437 | -0.233            |
| C10-N17(O <sub>2</sub> ) | 1.4270         | 0.8604 | 1.0489 | -0.227            | C15-N20(O <sub>2</sub> ) | 1.4349         | 0.8267 | 1.0399 | -0.230            |
| C10-N20(O <sub>2</sub> ) | 1.4654         | 0.7420 | 0.9778 | -0.155            | C16-N23(O <sub>2</sub> ) | 1.4338         | 0.8263 | 1.0433 | -0.229            |
|                          |                |        |        |                   | C16-N26(O <sub>2</sub> ) | 1.4354         | 0.8202 | 1.0391 | -0.226            |
| <b>3</b>                 |                |        |        |                   | <b>4</b>                 |                |        |        |                   |
| C7-N3                    | 1.3654         | 1.0705 | 1.1502 |                   | C9-N1                    | 1.4111         | 0.8672 | 0.9943 |                   |
| C7-N5                    | 1.3654         | 1.0707 | 1.1501 |                   | C9-N2                    | 1.4183         | 0.8484 | 0.9488 |                   |
| C7=C8                    | 1.3769         | 1.5874 | 1.5141 |                   | C9=C10                   | 1.3316         | 1.8680 | 1.8499 |                   |
| C8-N25(O <sub>2</sub> )  | 1.4512         | 0.7849 | 0.9964 | -0.154            | C10-N29(O <sub>2</sub> ) | 1.4786         | 0.7306 | 0.9605 | -0.066            |
| C8-N28(O <sub>2</sub> )  | 1.4513         | 0.7851 | 0.9963 | -0.154            | C10-N32(O <sub>2</sub> ) | 1.4762         | 0.7300 | 0.9319 | -0.054            |
| C9-N1                    | 1.3647         | 1.0758 | 1.1647 |                   | C11-N1                   | 1.3785         | 1.0024 | 1.1126 |                   |
| C9-N3                    | 1.3660         | 1.0688 | 1.1484 |                   | C11-N3                   | 1.3810         | 0.9998 | 1.1322 |                   |
| C9=C10                   | 1.3776         | 1.5877 | 1.5176 |                   | C11=C12                  | 1.3669         | 1.6425 | 1.5454 |                   |
| C10-N13(O <sub>2</sub> ) | 1.4536         | 0.7735 | 0.9916 | -0.153            | C12-N35(O <sub>2</sub> ) | 1.4500         | 0.7863 | 0.9822 | -0.172            |
| C10-N16(O <sub>2</sub> ) | 1.4497         | 0.7855 | 0.9946 | -0.156            | C12-N38(O <sub>2</sub> ) | 1.4551         | 0.7712 | 0.9924 | -0.168            |
| C11-N1                   | 1.3647         | 1.0758 | 1.1646 |                   | C13-N3                   | 1.4235         | 0.8309 | 0.9975 |                   |
| C11-N5                   | 1.3661         | 1.0687 | 1.1485 |                   | C13-N4                   | 1.3995         | 0.9148 | 1.0081 |                   |
| C11=C12                  | 1.3775         | 1.5879 | 1.5177 |                   | C13=C14                  | 1.3360         | 1.8378 | 1.8429 |                   |
| C12-N19(O <sub>2</sub> ) | 1.4498         | 0.7851 | 0.9945 | -0.156            | C14-N17(O <sub>2</sub> ) | 1.4689         | 0.7398 | 0.9443 | -0.079            |
| C12-N22(O <sub>2</sub> ) | 1.4535         | 0.7734 | 0.9917 | -0.153            | C14-N20(O <sub>2</sub> ) | 1.4776         | 0.7379 | 0.9514 | -0.090            |
|                          |                |        |        |                   | C15-N2                   | 1.3711         | 1.0320 | 1.1303 |                   |
|                          |                |        |        |                   | C15-N4                   | 1.4142         | 0.8527 | 1.0155 |                   |
|                          |                |        |        |                   | C15=C16                  | 1.3492         | 1.7587 | 1.6535 |                   |
|                          |                |        |        |                   | C16-N23(O <sub>2</sub> ) | 1.4398         | 0.8253 | 1.0129 | -0.145            |
|                          |                |        |        |                   | C16-N26(O <sub>2</sub> ) | 1.4732         | 0.7261 | 0.9530 | -0.115            |
